# Supplementary material for: Phytochemical Screening and Antioxidant Activity of Seven Native Species Growing in the Forests of Southern Chilean Patagonia
Source: MDPI journal article supplement (doi:10.3390/molecules26216722), 2021-11-06
Supplement: s1 [file s1]

**Table S1.** PCA loading vectors.

| Vectors | PCA1        | PCA2         |
|---------|-------------|--------------|
| TPC     | 0.41154     | – 0.41358    |
| TFC     | 0.49299     | 0.20456      |
| TCC     | 0.48567     | 0.18417      |
| THC     | 0.54696     | 0.30095      |
| TAC     | – 0.0013034 | – 0.00025391 |
| DPPH    | – 0.030853  | 0.22122      |
| ABTS    | – 0.023584  | 0.10372      |
| FRAP    | – 0.22592   | 0.77648      |
| CUPRAC  | 0.00064151  | – 0.0010751  |

**Table S2 – Part 1.** The similarity percentages breakdown procedure (SIMPER).

| Var    | Average dissimilarity |          |          |          |          |          |
|--------|-----------------------|----------|----------|----------|----------|----------|
|        | 1 vs 2                | 1 vs 3   | 1 vs 4   | 1 vs 5   | 1 vs 6   | 1 vs 7   |
| DPPH   | 0.2746                | 0.2589   | 2.494    | 2.67     | 0.9959   | 0.3311   |
| ABTS   | 0.1453                | 0.07301  | 0.9007   | 1.196    | 0.7182   | 0.07199  |
| FRAP   | 1.703                 | 0.4618   | 7.632    | 7.857    | 5.55     | 1.534    |
| CUPRAC | 0.006417              | 0.002167 | 0.008923 | 0.009068 | 0.008525 | 0.009728 |
| TPC    | 1.428                 | 2.752    | 4.738    | 5.724    | 5.772    | 5.587    |
| TFC    | 0.416                 | 1.082    | 1.65     | 0.1523   | 0.3271   | 10.06    |
| THC    | 1.758                 | 1.905    | 2.688    | 1.93     | 1.891    | 11.61    |
| TCC    | 4.006                 | 4.594    | 3.497    | 0.7693   | 0.4669   | 8.265    |
| TAC    | 0.05383               | 0.006352 | 0.002956 | 0.0306   | 0.05213  | 0.01046  |
| OAD*   | 9.792                 | 11.135   | 23.611   | 20.338   | 15.782   | 37.479   |

1: *A. chilensis*; 2: *N. dombeyi*; 3: *N. betuloides*; 4: *N. nitida*; 5: *N. pumilio*; 6: *N. antarctica*; 7: *B. microphylla* (leaf); 8: *B. microphylla* (flower). \* OAD: Overall average dissimilarity.

**Table S2 – Part 2.** The similarity percentages breakdown procedure (SIMPER).

| Var    | Average dissimilarity |         |         |         |          |          |         |         |          |
|--------|-----------------------|---------|---------|---------|----------|----------|---------|---------|----------|
|        | 2 vs 3                | 2 vs 4  | 2 vs 5  | 2 vs 6  | 2 vs 7   | 3 vs 4   | 3 vs 5  | 3 vs 6  | 3 vs 7   |
| DPPH   | 0.4168                | 2.749   | 2.937   | 1.178   | 0.4256   | 2.46     | 2.651   | 0.8292  | 0.1839   |
| ABTS   | 0.1478                | 1.073   | 1.386   | 0.8895  | 0.05581  | 0.9781   | 1.299   | 0.784   | 0.07005  |
| FRAP   | 1.715                 | 9.402   | 9.65    | 7.291   | 0.8212   | 8.449    | 8.696   | 6.227   | 1.493    |
| CUPRAC | 0.005714              | 0.01524 | 0.01543 | 0.01516 | 0.006044 | 0.01152  | 0.01169 | 0.01123 | 0.008999 |
| TPC    | 3.397                 | 5.302   | 6.346   | 6.426   | 5.593    | 2.679    | 3.641   | 3.593   | 7.662    |
| TFC    | 0.7218                | 2.105   | 0.3538  | 0.6913  | 10.71    | 2.785    | 0.9678  | 1.37    | 11.33    |
| THC    | 0.3767                | 3.051   | 1.649   | 1.349   | 12.22    | 3.44     | 2.004   | 3.593   | 12.65    |
| TCC    | 0.5059                | 0.3277  | 2.916   | 3.415   | 11.16    | 0.4542   | 3.433   | 3.971   | 11.67    |
| TAC    | 0.05257               | 0.0493  | 0.01779 | 0.01346 | 0.04552  | 0.006068 | 0.02758 | 0.05087 | 0.01486  |
| OAD*   | 7.339                 | 24.074  | 25.271  | 21.27   | 41.03    | 21.26    | 22.73   | 18.55   | 45.08    |

1: *A. chilensis*; 2: *N. dombeyi*; 3: *N. betuloides*; 4: *N. nitida*; 5: *N. pumilio*; 6: *N. antarctica*; 7: *B. microphylla* (leaf); 8: *B. microphylla* (flower). \* OAD: Overall average dissimilarity.

**Table S2 – Part 3.** The similarity percentages breakdown procedure (SIMPER).

| Var    | Average dissimilarity |          |         |          |         |         |
|--------|-----------------------|----------|---------|----------|---------|---------|
|        | 4 vs 5                | 4 vs 6   | 4 vs 7  | 5 vs 6   | 5 vs 7  | 6 vs 7  |
| DPPH   | 0.5247                | 1.51     | 1.367   | 1.677    | 1.481   | 0.3373  |
| ABTS   | 0.4655                | 0.4709   | 0.6646  | 0.5225   | 0.8616  | 0.5361  |
| FRAP   | 1.686                 | 2.916    | 6.605   | 3.107    | 6.756   | 5.201   |
| CUPRAC | 0.002415              | 0.002817 | 0.01528 | 0.002125 | 0.0154  | 0.01524 |
| TPC    | 1.293                 | 1.176    | 8.514   | 0.9638   | 9.194   | 9.329   |
| TFC    | 1.581                 | 1.342    | 8.471   | 0.3328   | 9.644   | 9.71    |
| THC    | 1.257                 | 1.64     | 9.252   | 0.4356   | 10.19   | 10.73   |
| TCC    | 2.565                 | 2.988    | 10.23   | 0.5033   | 8.417   | 8.44    |
| TAC    | 0.02813               | 0.04804  | 0.01026 | 0.01909  | 0.03058 | 0.04476 |
| OAD*   | 9.402                 | 12.09    | 45.12   | 7.564    | 46.59   | 44.34   |

1: *A. chilensis*; 2: *N. dombeyi*; 3: *N. betuloides*; 4: *N. nitida*; 5: *N. pumilio*; 6: *N. antarctica*; 7: *B. microphylla* (leaf); 8: *B. microphylla* (flower). \* OAD: Overall average dissimilarity.

**Figure S1.** Sampled species.

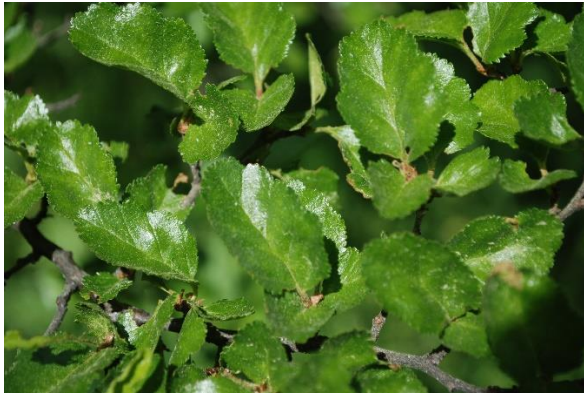

*Nothofagus antarctica*

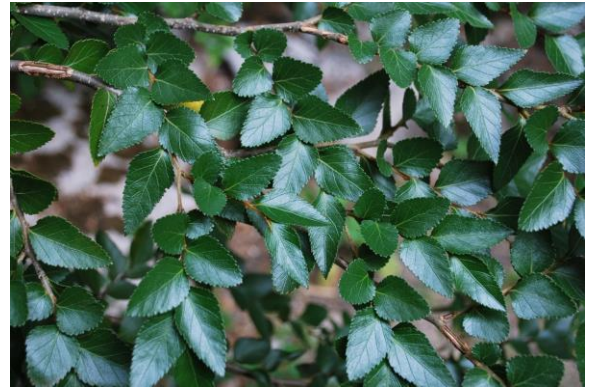

*Nothofagus nitida*

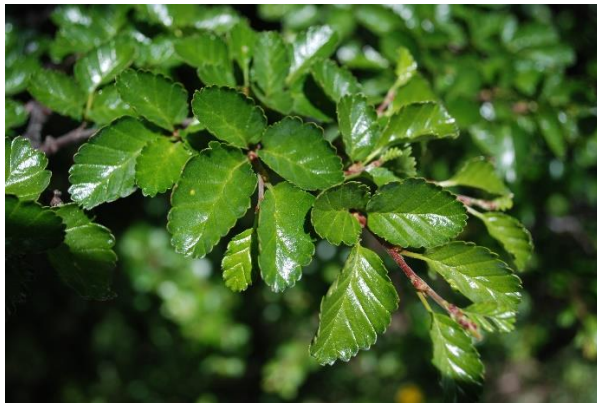

*Nothofagus pumilio*

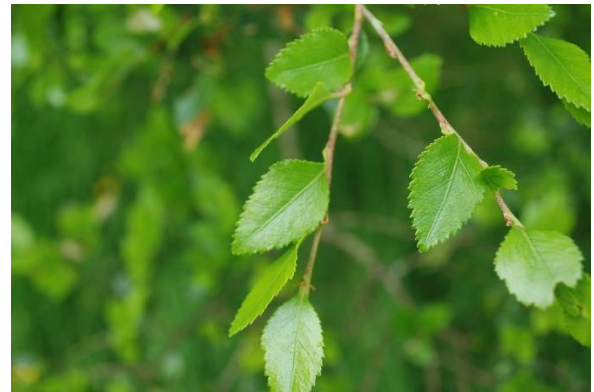

*Nothofagus dombeyi*

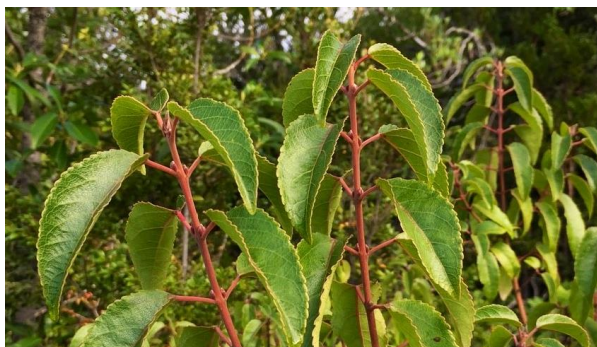

*Aristotelia chilensis*

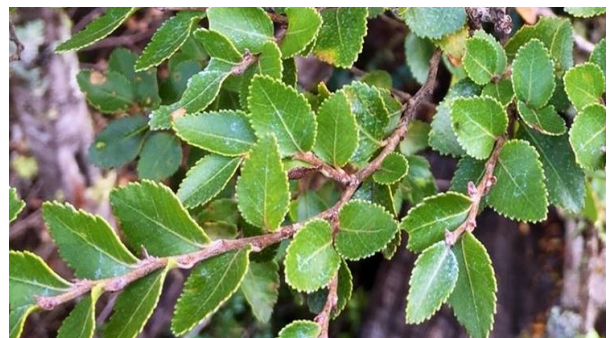

*Nothofagus betuloides*

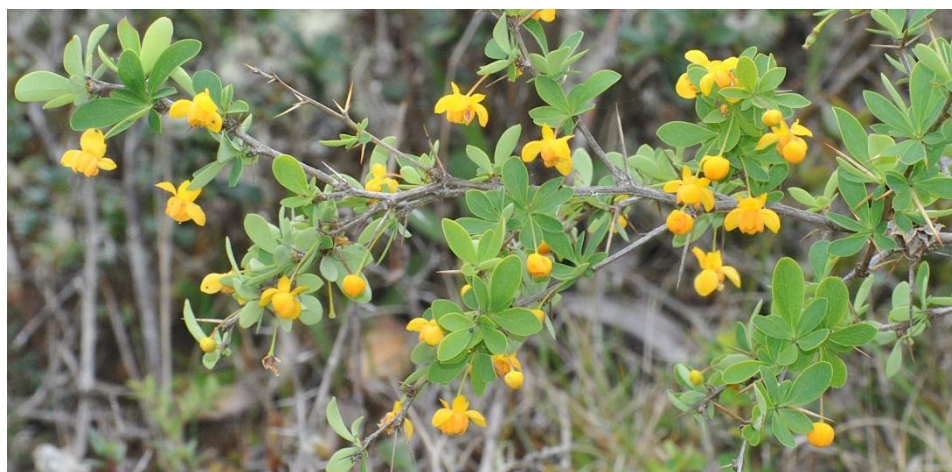

*Berberis microphylla*
